# Supplementary material
Source: ML conference proceedings conference paper supplement (https://openaccess.thecvf.com/content/WACV2026/html/Hagos_Performance_of_Conformal_WACV_2026_paper.html)
Supplement: Supplementary file 1 [file 1305_supp_pdf.pdf › 1305_supp_pdf.pdf]

## Supplementary material

### Performance of Conformal Prediction in Capturing Aleatoric Uncertainty

**Models' and conformal predictors' performance** The models' accuracy and the conformal predictors' coverage, SSC, and mean set size ( $\bar{w}$ ) on all four datasets are presented in Table A1 to Table A4.

**Distribution of prediction set sizes** Figure A1 shows the prediction set size distribution of the three conformal predictors.

**Coverage at different prediction set sizes** We show how coverage changes with increasing set sizes in Figure A2.

**Impact of prevalence of larger prediction set sizes on correlation analysis** We show how the correlation between prediction set sizes and class overlap changes with the prevalence of larger set sizes in Figure A3. We follow an incremental approach to see the effect of larger set sizes on the correlation analysis. We start with prediction sets with size  $\leq 2$  and incrementally add sets with larger sizes. The Spearman's rank correlation coefficient of prediction sets that contain larger set sizes shows improvement, albeit small.

**Similarity between conformal prediction sets and human annotation** We assess the similarity between the prediction sets of the conformal predictors and human annotations using the metrics precision, recall, subset-accuracy (S. Acc), and Hamming loss. The results on all the datasets are presented in Tables A5 to A8.

**Correlation between conformal prediction sets and human annotation entropy** We present the results of the correlation analysis between prediction sets and human annotation entropy on the CIFAR-10H and FER+ datasets in Table A9.

**Expected Calibration Error** Table A10 presents the Expected Calibration Error (ECE) using M=15 bins for all the models.

Table A1. Models' and conformal predictors' performance on the CIFAR-10H dataset.

| Models       | Accuracy | LAC      |       |           | APS      |       |           | RAPS     |       |           |
|--------------|----------|----------|-------|-----------|----------|-------|-----------|----------|-------|-----------|
|              |          | Coverage | SSC   | $\bar{w}$ | Coverage | SSC   | $\bar{w}$ | Coverage | SSC   | $\bar{w}$ |
| ResNet18     | 0.930    | 0.944    | 0.894 | 1.040     | 0.977    | 0.953 | 1.357     | 0.978    | 0.952 | 1.361     |
| ResNet34     | 0.933    | 0.953    | 0.833 | 1.062     | 0.979    | 0.953 | 1.369     | 0.976    | 0.950 | 1.304     |
| ResNet50     | 0.936    | 0.953    | 0.500 | 1.050     | 0.974    | 0.939 | 1.263     | 0.975    | 0.959 | 1.285     |
| VGG-16       | 0.941    | 0.955    | 0.853 | 1.049     | 0.982    | 0.930 | 1.328     | 0.979    | 0.882 | 1.263     |
| VGG-19       | 0.939    | 0.951    | 0.000 | 1.039     | 0.976    | 0.907 | 1.264     | 0.973    | 0.895 | 1.207     |
| DenseNet121  | 0.940    | 0.942    | 0.000 | 1.006     | 0.979    | 0.938 | 1.395     | 0.975    | 0.947 | 1.274     |
| DenseNet161  | 0.940    | 0.944    | 0.000 | 1.011     | 0.977    | 0.941 | 1.347     | 0.976    | 0.927 | 1.309     |
| MobileNet-v2 | 0.939    | 0.951    | 0.000 | 1.030     | 0.984    | 0.953 | 1.425     | 0.982    | 0.966 | 1.370     |

Table A2. Models' and conformal predictors' performance on the MLRSNet dataset.

| Models       | Accuracy | LAC      |       |           | APS      |       |           | RAPS     |       |           |
|--------------|----------|----------|-------|-----------|----------|-------|-----------|----------|-------|-----------|
|              |          | Coverage | SSC   | $\bar{w}$ | Coverage | SSC   | $\bar{w}$ | Coverage | SSC   | $\bar{w}$ |
| ResNet18     | 0.927    | 0.951    | 0.000 | 1.081     | 0.984    | 0.889 | 1.575     | 0.985    | 0.900 | 1.624     |
| ResNet34     | 0.923    | 0.951    | 0.831 | 1.090     | 0.982    | 0.500 | 1.500     | 0.982    | 0.750 | 1.526     |
| ResNet50     | 0.918    | 0.949    | 0.780 | 1.113     | 0.978    | 0.667 | 1.504     | 0.978    | 0.667 | 1.508     |
| VGG-16       | 0.872    | 0.950    | 0.750 | 1.613     | 0.955    | 0.833 | 1.798     | 0.963    | 0.887 | 2.059     |
| VGG-19       | 0.844    | 0.955    | 0.889 | 2.106     | 0.958    | 0.875 | 2.352     | 0.974    | 0.953 | 3.386     |
| DenseNet121  | 0.933    | 0.951    | 0.000 | 1.059     | 0.984    | 0.000 | 1.513     | 0.985    | 0.500 | 1.547     |
| DenseNet161  | 0.946    | 0.956    | 0.000 | 1.026     | 0.985    | 0.928 | 1.320     | 0.984    | 0.905 | 1.316     |
| MobileNet-v2 | 0.860    | 0.953    | 0.750 | 1.635     | 0.978    | 0.937 | 2.596     | 0.981    | 0.917 | 2.859     |

Table A3. Models' and conformal predictors' performance on the FER+ dataset.

| Models       | Accuracy | LAC      |       |           | APS      |       |           | RAPS     |       |           |
|--------------|----------|----------|-------|-----------|----------|-------|-----------|----------|-------|-----------|
|              |          | Coverage | SSC   | $\bar{w}$ | Coverage | SSC   | $\bar{w}$ | Coverage | SSC   | $\bar{w}$ |
| ResNet18     | 0.825    | 0.941    | 0.818 | 1.561     | 0.961    | 0.920 | 2.250     | 0.960    | 0.920 | 2.233     |
| ResNet34     | 0.839    | 0.939    | 0.934 | 1.484     | 0.958    | 0.936 | 2.085     | 0.958    | 0.933 | 2.138     |
| ResNet50     | 0.838    | 0.940    | 0.857 | 1.493     | 0.959    | 0.800 | 2.027     | 0.961    | 0.857 | 2.148     |
| VGG-16       | 0.835    | 0.946    | 0.875 | 1.530     | 0.970    | 0.952 | 2.274     | 0.970    | 0.951 | 2.318     |
| VGG-19       | 0.823    | 0.943    | 0.935 | 1.561     | 0.964    | 0.875 | 2.222     | 0.966    | 0.923 | 2.316     |
| DenseNet121  | 0.832    | 0.945    | 0.833 | 1.521     | 0.965    | 0.833 | 2.199     | 0.967    | 0.857 | 2.273     |
| DenseNet161  | 0.836    | 0.943    | 0.938 | 1.496     | 0.962    | 0.932 | 2.208     | 0.964    | 0.929 | 2.283     |
| MobileNet-v2 | 0.827    | 0.944    | 0.940 | 1.563     | 0.965    | 0.952 | 2.237     | 0.966    | 0.952 | 2.311     |

Table A4. Models' and conformal predictors' performance on the ImageNet-Real dataset.

| Models       | Accuracy | LAC      |       |           | APS      |       |           | RAPS     |       |           |
|--------------|----------|----------|-------|-----------|----------|-------|-----------|----------|-------|-----------|
|              |          | Coverage | SSC   | $\bar{w}$ | Coverage | SSC   | $\bar{w}$ | Coverage | SSC   | $\bar{w}$ |
| ResNet18     | 0.725    | 0.902    | 0.500 | 2.994     | 0.939    | 0.000 | 12.680    | 0.939    | 0.000 | 12.712    |
| ResNet34     | 0.759    | 0.899    | 0.681 | 2.157     | 0.940    | 0.000 | 8.894     | 0.940    | 0.500 | 8.943     |
| ResNet50     | 0.785    | 0.903    | 0.000 | 1.760     | 0.946    | 0.000 | 7.768     | 0.946    | 0.000 | 7.892     |
| VGG-16       | 0.745    | 0.902    | 0.000 | 2.461     | 0.943    | 0.000 | 10.690    | 0.943    | 0.000 | 10.587    |
| VGG-19       | 0.751    | 0.903    | 0.000 | 2.355     | 0.946    | 0.000 | 10.764    | 0.946    | 0.000 | 10.692    |
| DenseNet121  | 0.770    | 0.902    | 0.000 | 2.030     | 0.946    | 0.000 | 8.644     | 0.946    | 0.000 | 8.702     |
| DenseNet161  | 0.796    | 0.902    | 0.000 | 1.633     | 0.942    | 0.000 | 6.053     | 0.942    | 0.000 | 6.034     |
| MobileNet-v2 | 0.744    | 0.902    | 0.688 | 2.496     | 0.940    | 0.000 | 9.539     | 0.941    | 0.000 | 9.730     |

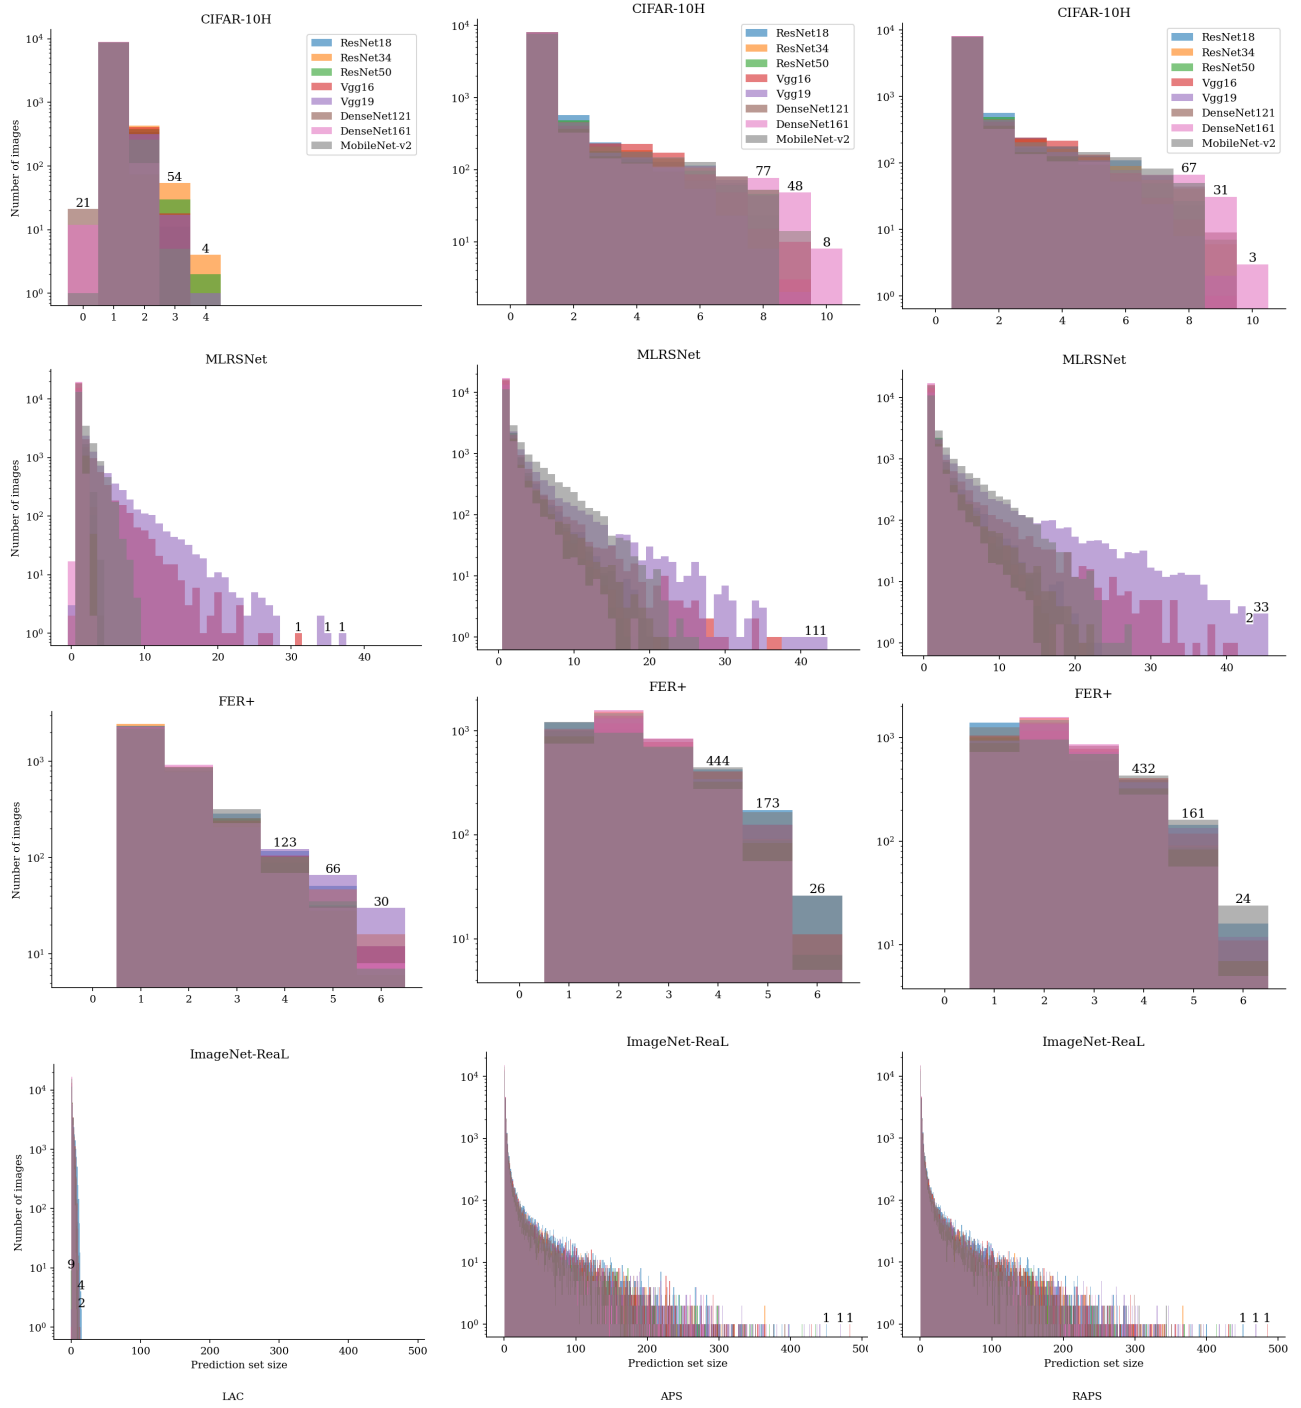

Figure A1. Distribution of prediction set sizes. The y-axis is log-scaled for easier visualization of the imbalanced counts. The count of the largest three prediction set sizes is shown on top of the bars. The three columns, from left to right, represent LAC, APS, and RAPS, respectively.

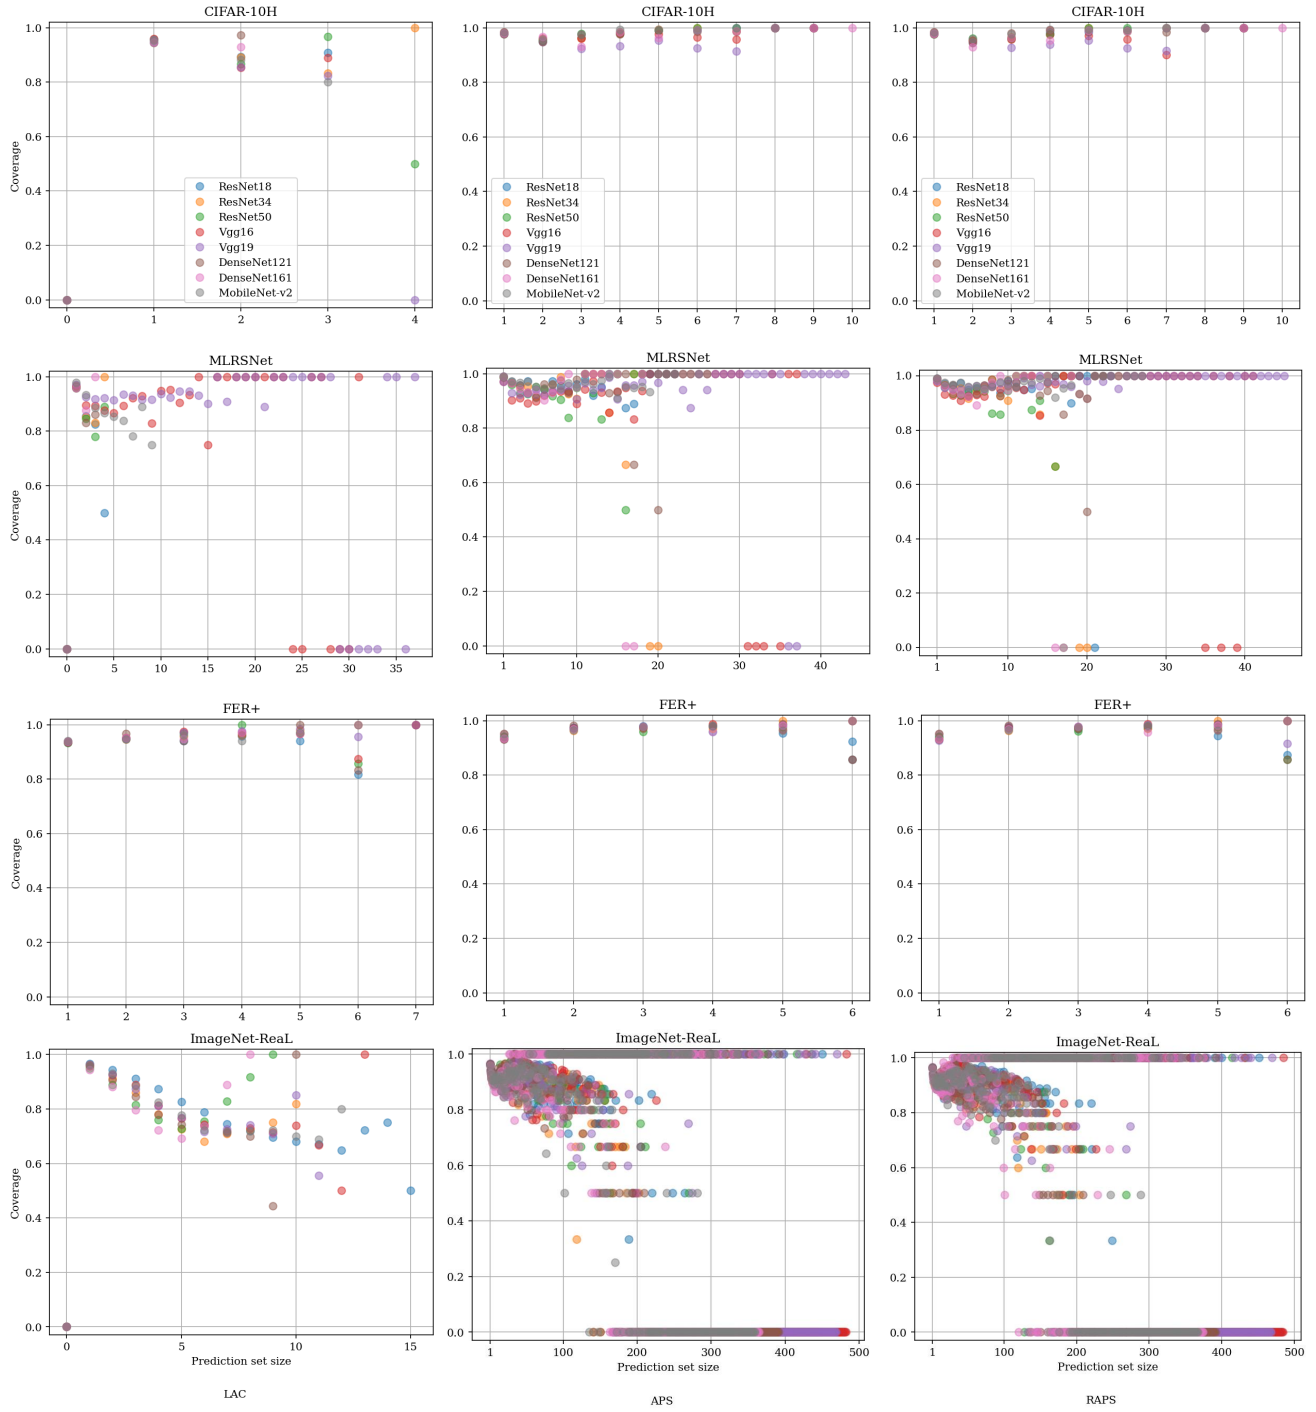

Figure A2. Coverage at different prediction set sizes. The X-axis shows prediction set sizes, and the Y-axis shows the coverage. The three columns, from left to right, represent LAC, APS, and RAPS, respectively.

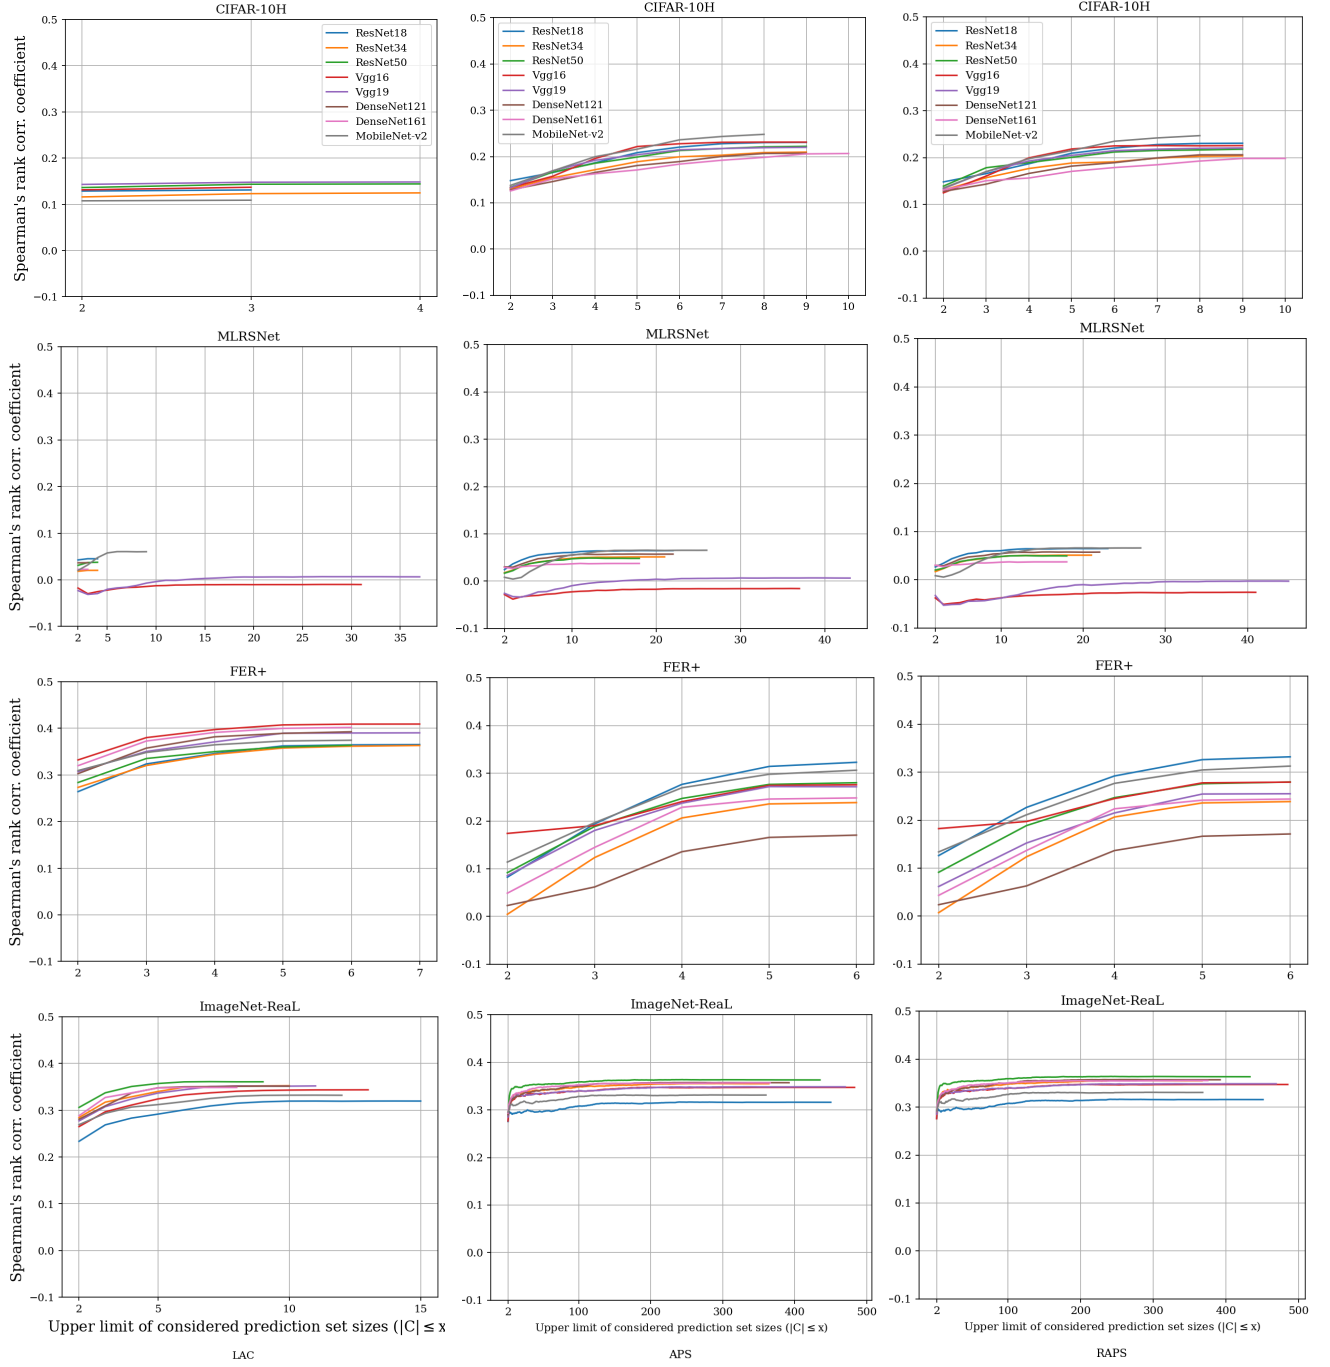

Figure A3. Spearman's rank correlation coefficient,  $r_s$ ,  $p < .001$ , between prediction set sizes and class overlap with an increased prevalence of larger prediction sets. The X-axis shows the upper limit of the considered prediction set sizes ( $|C| \leq x$ ), and the Y-axis shows Spearman's rank correlation coefficient. The three columns, from left to right, represent LAC, APS, and RAPS, respectively.

Table A5. Similarity between conformal predictors and human annotations on the CIFAR-10H dataset

| LAC       |        |        |                               | APS       |        |        |                               | RAPS      |        |        |                               |
|-----------|--------|--------|-------------------------------|-----------|--------|--------|-------------------------------|-----------|--------|--------|-------------------------------|
| Precision | Recall | S. Acc | Hamming loss ( $\downarrow$ ) | Precision | Recall | S. Acc | Hamming loss ( $\downarrow$ ) | Precision | Recall | S. Acc | Hamming loss ( $\downarrow$ ) |
| 0.967     | 0.661  | 0.099  | 0.426                         | 0.935     | 0.705  | 0.107  | 0.419                         | 0.935     | 0.705  | 0.107  | 0.419                         |
| 0.966     | 0.667  | 0.099  | 0.429                         | 0.936     | 0.707  | 0.109  | 0.415                         | 0.941     | 0.702  | 0.107  | 0.418                         |
| 0.971     | 0.667  | 0.098  | 0.431                         | 0.945     | 0.704  | 0.105  | 0.423                         | 0.950     | 0.699  | 0.103  | 0.426                         |
| 0.972     | 0.667  | 0.098  | 0.429                         | 0.943     | 0.707  | 0.105  | 0.422                         | 0.948     | 0.703  | 0.103  | 0.424                         |
| 0.973     | 0.665  | 0.098  | 0.430                         | 0.955     | 0.694  | 0.101  | 0.429                         | 0.954     | 0.695  | 0.101  | 0.428                         |
| 0.974     | 0.656  | 0.099  | 0.428                         | 0.951     | 0.697  | 0.105  | 0.425                         | 0.952     | 0.696  | 0.104  | 0.425                         |
| 0.974     | 0.658  | 0.099  | 0.428                         | 0.943     | 0.703  | 0.111  | 0.421                         | 0.949     | 0.697  | 0.107  | 0.422                         |
| 0.975     | 0.664  | 0.098  | 0.431                         | 0.939     | 0.709  | 0.107  | 0.421                         | 0.939     | 0.709  | 0.107  | 0.422                         |

Table A6. Similarity between conformal predictors and human annotations on the MLRSNET dataset

| LAC       |        |        |                               | APS       |        |        |                               | RAPS      |        |        |                               |
|-----------|--------|--------|-------------------------------|-----------|--------|--------|-------------------------------|-----------|--------|--------|-------------------------------|
| Precision | Recall | S. Acc | Hamming loss ( $\downarrow$ ) | Precision | Recall | S. Acc | Hamming loss ( $\downarrow$ ) | Precision | Recall | S. Acc | Hamming loss ( $\downarrow$ ) |
| 0.927     | 0.688  | 0.181  | 0.345                         | 0.901     | 0.711  | 0.198  | 0.228                         | 0.905     | 0.710  | 0.196  | 0.230                         |
| 0.931     | 0.665  | 0.173  | 0.351                         | 0.889     | 0.720  | 0.192  | 0.219                         | 0.884     | 0.722  | 0.197  | 0.218                         |
| 0.936     | 0.619  | 0.172  | 0.366                         | 0.921     | 0.693  | 0.190  | 0.245                         | 0.918     | 0.697  | 0.188  | 0.242                         |
| 0.941     | 0.655  | 0.166  | 0.352                         | 0.900     | 0.728  | 0.180  | 0.209                         | 0.907     | 0.709  | 0.184  | 0.206                         |
| 0.930     | 0.677  | 0.174  | 0.370                         | 0.922     | 0.709  | 0.195  | 0.223                         | 0.919     | 0.715  | 0.192  | 0.221                         |
| 0.931     | 0.682  | 0.160  | 0.351                         | 0.899     | 0.698  | 0.201  | 0.208                         | 0.892     | 0.697  | 0.199  | 0.207                         |
| 0.932     | 0.690  | 0.151  | 0.361                         | 0.891     | 0.755  | 0.175  | 0.211                         | 0.899     | 0.744  | 0.187  | 0.213                         |
| 0.933     | 0.674  | 0.163  | 0.373                         | 0.881     | 0.699  | 0.202  | 0.201                         | 0.895     | 0.723  | 0.201  | 0.198                         |

Table A7. Similarity between conformal predictors and human annotations on the FER+ dataset

| LAC       |        |        |                               | APS       |        |        |                               | RAPS      |        |        |                               |
|-----------|--------|--------|-------------------------------|-----------|--------|--------|-------------------------------|-----------|--------|--------|-------------------------------|
| Precision | Recall | S. Acc | Hamming loss ( $\downarrow$ ) | Precision | Recall | S. Acc | Hamming loss ( $\downarrow$ ) | Precision | Recall | S. Acc | Hamming loss ( $\downarrow$ ) |
| 0.918     | 0.710  | 0.146  | 0.364                         | 0.753     | 0.775  | 0.196  | 0.234                         | 0.785     | 0.766  | 0.185  | 0.267                         |
| 0.934     | 0.698  | 0.144  | 0.365                         | 0.756     | 0.762  | 0.186  | 0.214                         | 0.754     | 0.763  | 0.187  | 0.213                         |
| 0.933     | 0.707  | 0.141  | 0.376                         | 0.758     | 0.776  | 0.182  | 0.239                         | 0.760     | 0.776  | 0.181  | 0.241                         |
| 0.934     | 0.717  | 0.137  | 0.384                         | 0.756     | 0.795  | 0.186  | 0.249                         | 0.761     | 0.794  | 0.185  | 0.253                         |
| 0.928     | 0.713  | 0.144  | 0.374                         | 0.760     | 0.782  | 0.186  | 0.238                         | 0.740     | 0.788  | 0.192  | 0.224                         |
| 0.928     | 0.712  | 0.139  | 0.377                         | 0.740     | 0.784  | 0.190  | 0.217                         | 0.739     | 0.784  | 0.191  | 0.217                         |
| 0.936     | 0.713  | 0.136  | 0.386                         | 0.727     | 0.785  | 0.190  | 0.209                         | 0.723     | 0.786  | 0.192  | 0.205                         |
| 0.918     | 0.716  | 0.143  | 0.375                         | 0.758     | 0.782  | 0.194  | 0.242                         | 0.765     | 0.781  | 0.191  | 0.252                         |

Table A8. Similarity between conformal predictors and human annotations on the ImageNet-Real dataset

| LAC       |        |        |                               | APS       |        |        |                               | RAPS      |        |        |                               |
|-----------|--------|--------|-------------------------------|-----------|--------|--------|-------------------------------|-----------|--------|--------|-------------------------------|
| Precision | Recall | S. Acc | Hamming loss ( $\downarrow$ ) | Precision | Recall | S. Acc | Hamming loss ( $\downarrow$ ) | Precision | Recall | S. Acc | Hamming loss ( $\downarrow$ ) |
| 0.571     | 0.892  | 0.002  | 0.370                         | 0.568     | 0.934  | 0.012  | 0.417                         | 0.567     | 0.934  | 0.012  | 0.416                         |
| 0.670     | 0.885  | 0.001  | 0.481                         | 0.631     | 0.930  | 0.008  | 0.480                         | 0.629     | 0.931  | 0.008  | 0.478                         |
| 0.736     | 0.882  | 0.001  | 0.559                         | 0.678     | 0.931  | 0.007  | 0.529                         | 0.679     | 0.931  | 0.007  | 0.529                         |
| 0.628     | 0.887  | 0.002  | 0.434                         | 0.604     | 0.933  | 0.010  | 0.453                         | 0.603     | 0.934  | 0.010  | 0.452                         |
| 0.643     | 0.886  | 0.002  | 0.452                         | 0.611     | 0.934  | 0.010  | 0.462                         | 0.612     | 0.934  | 0.010  | 0.462                         |
| 0.684     | 0.884  | 0.001  | 0.494                         | 0.632     | 0.934  | 0.008  | 0.479                         | 0.632     | 0.934  | 0.008  | 0.479                         |
| 0.763     | 0.876  | 0.001  | 0.593                         | 0.705     | 0.921  | 0.005  | 0.552                         | 0.702     | 0.923  | 0.005  | 0.548                         |
| 0.625     | 0.887  | 0.002  | 0.430                         | 0.604     | 0.930  | 0.008  | 0.452                         | 0.599     | 0.932  | 0.009  | 0.447                         |

Table A9. Spearman's rank correlation coefficient,  $r_s$ ,  $p < .001$ , between conformal prediction set sizes and human annotation entropy.

| Models       | CIFAR-10H |       |       | FER+  |       |       |
|--------------|-----------|-------|-------|-------|-------|-------|
|              | LAC       | APS   | RAPS  | LAC   | APS   | RAPS  |
| ResNet18     | 0.140     | 0.255 | 0.255 | 0.404 | 0.354 | 0.365 |
| ResNet34     | 0.142     | 0.233 | 0.228 | 0.413 | 0.272 | 0.272 |
| ResNet50     | 0.160     | 0.246 | 0.240 | 0.413 | 0.309 | 0.310 |
| VGG-16       | 0.153     | 0.254 | 0.246 | 0.457 | 0.297 | 0.301 |
| VGG-19       | 0.162     | 0.240 | 0.241 | 0.429 | 0.296 | 0.276 |
| DenseNet121  | 0.025     | 0.230 | 0.228 | 0.437 | 0.191 | 0.191 |
| DenseNet161  | 0.058     | 0.228 | 0.220 | 0.454 | 0.277 | 0.272 |
| MobileNet-v2 | 0.124     | 0.269 | 0.268 | 0.427 | 0.337 | 0.343 |

Table A10. Expected Calibration Error (ECE) with M = 15 bins.

| Models       | CIFAR-10H | MLRSNet | FER+  | ImageNet-Real |
|--------------|-----------|---------|-------|---------------|
| ResNet18     | 0.021     | 0.013   | 0.032 | 0.021         |
| ResNet34     | 0.026     | 0.023   | 0.035 | 0.027         |
| ResNet50     | 0.023     | 0.030   | 0.026 | 0.032         |
| VGG-16       | 0.016     | 0.100   | 0.037 | 0.020         |
| VGG-19       | 0.022     | 0.119   | 0.053 | 0.020         |
| DenseNet121  | 0.020     | 0.018   | 0.034 | 0.020         |
| DenseNet161  | 0.021     | 0.019   | 0.038 | 0.047         |
| MobileNet-v2 | 0.025     | 0.012   | 0.027 | 0.020         |
